# Supplementary material for: Clinical and Humanistic Burden of Atopic Dermatitis in Europe: Analyses of the National Health and Wellness Survey
Source: Springer Nature journal article supplement (doi:10.1007/s13555-022-00700-6), 2022-03-28
Supplement: MOESM1 [file 20259454]

## **SUPPLEMENTAL INFORMATION**

### **The Burden of AD in Europe: Analyses of the National Health and Wellness Survey**

Thomas Luger,<sup>1</sup> William A. Romero,<sup>2</sup> David Gruben,<sup>3</sup> Timothy W. Smith,<sup>4</sup> Amy Cha,<sup>5</sup> Maureen P. Neary<sup>5</sup>

<sup>1</sup>University Hospital Münster, Münster, Germany; <sup>2</sup>Pfizer Ltd., Surrey, United Kingdom; <sup>3</sup>Pfizer Inc., Groton, CT, USA; <sup>4</sup>Pfizer Inc., New York, NY, USA; <sup>5</sup>Pfizer Inc. Collegeville, PA, USA

**Table S1.** Demographic and clinical characteristics by self-reported AD severity

|                                                              | <b>Mild-to-moderate AD</b>    |                                                               | <b>Moderate-to-severe AD</b>  |                                                               |
|--------------------------------------------------------------|-------------------------------|---------------------------------------------------------------|-------------------------------|---------------------------------------------------------------|
|                                                              | <b>AD cohort<br/>N = 4039</b> | <b>Matched<br/>non-AD<br/>control<br/>cohort<br/>N = 4039</b> | <b>AD cohort<br/>N = 1346</b> | <b>Matched<br/>non-AD<br/>control<br/>cohort<br/>N = 1346</b> |
| Age, mean (range), years                                     | 45.7 (18–91)                  | 45.5 (18–87)                                                  | 44.6 (18–91)                  | 44.4 (18–84)                                                  |
| Female, n (%)                                                | 2743 (67.9%)                  | 2767 (68.5)                                                   | 963 (71.6)                    | 964 (71.6)                                                    |
| Geographic location, n (%)                                   |                               |                                                               |                               |                                                               |
| UK                                                           | 1373 (34.0)                   | 1339 (33.2)                                                   | 386 (28.7)                    | 379 (28.2)                                                    |
| France                                                       | 1041 (25.8)                   | 1091 (27.0)                                                   | 387 (28.8)                    | 383 (28.5)                                                    |
| Spain                                                        | 626 (15.5)                    | 659 (16.3)                                                    | 207 (15.4)                    | 220 (16.3)                                                    |
| Germany                                                      | 589 (14.6)                    | 544 (13.5)                                                    | 193 (14.3)                    | 190 (14.1)                                                    |
| Italy                                                        | 410 (10.2)                    | 406 (10.1)                                                    | 173 (12.9)                    | 174 (12.9)                                                    |
| Employed, n (%)                                              | 2223 (55.0)                   | 2329 (57.7)                                                   | 738 (54.8)                    | 799 (59.4)                                                    |
| Charlson comorbidity index, n (%)                            |                               |                                                               |                               |                                                               |
| 0                                                            | 3323 (82.3)                   | 3417 (84.6)                                                   | 1085 (80.6)                   | 1104 (82.0)                                                   |
| 1                                                            | 426 (10.6)                    | 384 (9.5)                                                     | 143 (10.6)                    | 133 (9.9)                                                     |
| 2                                                            | 181 (4.5)                     | 145 (3.6)                                                     | 78 (5.8)                      | 70 (5.2)                                                      |
| ≥3                                                           | 109 (2.7)                     | 93 (2.3)                                                      | 40 (3.0)                      | 39 (2.9)                                                      |
| Other atopic condition<br>(allergic rhinitis, asthma), n (%) | 1502 (37.2)                   | 1482 (36.7)                                                   | 517 (38.4)                    | 512 (38.0)                                                    |

*AD* Atopic dermatitis, *UK* United Kingdom

<sup>a</sup> AD cohort versus matched non-AD control cohort

**Table S2.** History of disease by self-reported AD severity

|                                           | <b>Mild-to-moderate<br/>AD cohort<br/>N = 4039</b> | <b>Moderate-to-severe<br/>AD cohort<br/>N = 1346</b> |
|-------------------------------------------|----------------------------------------------------|------------------------------------------------------|
| Time since diagnosis, n (%)               |                                                    |                                                      |
| <5 years                                  | 1412 (35.0)                                        | 473 (35.1)                                           |
| 6–10 years                                | 508 (12.6)                                         | 179 (13.3)                                           |
| 11–15 years                               | 338 (8.4)                                          | 108 (8.0)                                            |
| ≥16 years                                 | 1655 (41.0)                                        | 556 (41.3)                                           |
| Missing/unknown                           | 126 (3.1)                                          | 30 (2.2)                                             |
| Diagnosing healthcare professional, n (%) |                                                    |                                                      |
| Primary care/general practice             | 1974 (48.9)                                        | 555 (41.2)                                           |
| Dermatologist                             | 1489 (36.9)                                        | 591 (43.9)                                           |
| Allergist                                 | 153 (3.8)                                          | 70 (5.2)                                             |
| Pediatrician                              | 127 (3.1)                                          | 41 (3.1)                                             |
| Nurse practitioner/physician assistant    | 94 (2.3)                                           | 29 (2.2)                                             |
| Other                                     | 76 (1.9)                                           | 30 (2.2)                                             |
| Missing/unknown                           | 126 (3.1)                                          | 30 (2.2)                                             |
| Self-reported severity, n (%)             |                                                    |                                                      |
| Mild                                      | 2862 (70.9)                                        | 0                                                    |
| Moderate                                  | 1177 (29.1)                                        | 1177 (87.4)                                          |
| Severe                                    | 0                                                  | 169 (12.6)                                           |
| AD location, n (%)                        |                                                    |                                                      |
| Hands                                     | 1401 (34.7)                                        | 533 (39.6)                                           |
| Face/neck                                 | 1255 (31.1)                                        | 492 (36.6)                                           |
| Lower arm                                 | 1061 (26.3)                                        | 427 (31.7)                                           |
| Lower leg                                 | 1006 (24.9)                                        | 373 (27.7)                                           |
| Upper arm                                 | 872 (21.6)                                         | 373 (27.7)                                           |
| Scalp/head                                | 855 (21.2)                                         | 354 (26.3)                                           |
| Upper leg                                 | 615 (15.2)                                         | 294 (21.8)                                           |
| Feet                                      | 585 (14.5)                                         | 241 (17.9)                                           |
| Chest/torso                               | 567 (14.0)                                         | 256 (19.0)                                           |
| Back                                      | 500 (12.4)                                         | 239 (17.8)                                           |
| Buttocks                                  | 317 (7.9)                                          | 167 (12.4)                                           |
| Other                                     | 340 (8.4)                                          | 120 (8.9)                                            |

|                                            |             |            |
|--------------------------------------------|-------------|------------|
| Over-the-counter treatment for AD, n (%)   |             |            |
| Yes                                        | 1093 (27.1) | 415 (30.8) |
| No                                         | 2260 (56.0) | 658 (48.9) |
| Missing/unknown                            | 686 (17.0)  | 273 (20.3) |
| Prescription treatment for AD, n (%)       |             |            |
| Yes                                        | 1706 (42.2) | 578 (42.9) |
| No                                         | 2333 (57.8) | 768 (57.1) |
| Prescribing healthcare professional, n (%) |             |            |
| Primary care/general practice              | 1033 (25.6) | 289 (21.5) |
| Dermatologist                              | 537 (13.3)  | 248 (18.4) |
| Allergist                                  | 52 (1.3)    | 22 (1.6)   |
| Nurse practitioner/physician assistant     | 40 (1.0)    | 11 (0.8)   |
| Other                                      | 44 (1.1)    | 8 (0.6)    |
| DLQI, n (%)                                |             |            |
| No effect (0 or 1)                         | 1680 (41.6) | 286 (21.3) |
| Small effect (2–5)                         | 1448 (35.9) | 519 (38.6) |
| Moderate effect (6–10)                     | 560 (13.9)  | 277 (20.6) |
| Very large effect (11–20)                  | 295 (7.3)   | 219 (16.3) |
| Extremely large effect (21–30)             | 56 (1.4)    | 45 (3.3)   |

*AD* Atopic dermatitis, *DLQI* Dermatology Life Quality Index

**Table S3.** Comorbidity burden by self-reported AD severity and in matched non-AD control cohorts

|                                                | Mild-to-moderate AD cohort<br>N = 4039 |                         | Matched non-AD control cohort<br>N = 4039 | P value <sup>a</sup> | Moderate-to-severe AD cohort<br>N = 1346 |                      | Matched non-AD control cohort<br>N = 1346 | P value <sup>a</sup> |
|------------------------------------------------|----------------------------------------|-------------------------|-------------------------------------------|----------------------|------------------------------------------|----------------------|-------------------------------------------|----------------------|
|                                                | Mild AD<br>n = 2862                    | Moderate AD<br>n = 1177 |                                           |                      | Moderate AD<br>n = 1177                  | Severe AD<br>n = 169 |                                           |                      |
| Atopic comorbidities                           |                                        |                         |                                           |                      |                                          |                      |                                           |                      |
| Allergies                                      | 1146 (40.0)                            | 567 (48.2)              | 907 (22.5)                                | <0.0001              | 567 (48.2)                               | 87 (51.5)            | 315 (23.4)                                | <0.0001              |
| Allergic rhinitis                              | 746 (26.1)                             | 294 (25.0)              | 925 (22.9)                                | 0.009                | 294 (25.0)                               | 48 (28.4)            | 307 (22.8)                                | 0.18                 |
| Asthma                                         | 632 (22.1)                             | 281 (23.9)              | 796 (19.7)                                | 0.003                | 281 (23.9)                               | 46 (27.2)            | 273 (20.3)                                | 0.03                 |
| Food allergies                                 | 389 (13.6)                             | 201 (17.1)              | 229 (5.7)                                 | <0.0001              | 201 (17.1)                               | 40 (23.7)            | 92 (6.8)                                  | <0.0001              |
| Cardiac, vascular, and metabolic comorbidities |                                        |                         |                                           |                      |                                          |                      |                                           |                      |
| Hypertension                                   | 604 (21.1)                             | 248 (21.1)              | 684 (16.9)                                | <0.0001              | 248 (21.1)                               | 43 (25.4)            | 215 (16.0)                                | 0.0004               |
| High cholesterol                               | 578 (20.2)                             | 240 (20.4)              | 612 (15.2)                                | <0.0001              | 240 (20.4)                               | 38 (22.5)            | 186 (13.8)                                | <0.0001              |
| Angina                                         | 315 (11.0)                             | 137 (11.6)              | 306 (7.6)                                 | <0.0001              | 137 (11.6)                               | 25 (14.8)            | 117 (8.7)                                 | 0.008                |
| Type 2 diabetes                                | 183 (6.4)                              | 78 (6.6)                | 253 (6.3)                                 | 0.90                 | 78 (6.6)                                 | 13 (7.7)             | 74 (5.5)                                  | 0.34                 |
| Atrial fibrillation                            | 39 (1.4)                               | 16 (1.4)                | 51 (1.3)                                  | 0.93                 | 16 (1.4)                                 | 7 (4.1)              | 18 (1.3)                                  | 0.02                 |
| Heart attack                                   | 38 (1.3)                               | 22 (1.9)                | 55 (1.4)                                  | 0.37                 | 22 (1.9)                                 | 4 (2.4)              | 11 (0.8)                                  | 0.04                 |
| Congestive heart failure                       | 27 (0.9)                               | 17 (1.4)                | 37 (0.9)                                  | 0.26                 | 17 (1.4)                                 | 2 (1.2)              | 15 (1.1)                                  | 0.76                 |
| Peripheral vascular disease                    | 13 (0.5)                               | 11 (0.9)                | 14 (0.4)                                  | 0.03                 | 11 (0.9)                                 | 2 (1.2)              | 2 (0.2)                                   | 0.02                 |
| Stroke                                         | 27 (0.9)                               | 7 (0.6)                 | 35 (0.9)                                  | 0.55                 | 7 (0.6)                                  | 1 (0.6)              | 12 (0.9)                                  | 0.67                 |
| Neuropsychiatric comorbidities                 |                                        |                         |                                           |                      |                                          |                      |                                           |                      |
| Pain                                           | 903 (31.6)                             | 413 (35.1)              | 878 (21.7)                                | <0.0001              | 413 (35.1)                               | 66 (39.1)            | 315 (23.4)                                | <0.0001              |

|                                          |            |            |            |         |            |           |            |         |
|------------------------------------------|------------|------------|------------|---------|------------|-----------|------------|---------|
| Migraine                                 | 513 (17.9) | 246 (20.9) | 484 (12.0) | <0.0001 | 246 (20.9) | 51 (30.2) | 173 (12.9) | <0.0001 |
| Attention deficit disorder               | 24 (0.8)   | 14 (1.2)   | 13 (0.3)   | 0.0009  | 14 (1.2)   | 6 (3.6)   | 6 (0.5)    | 0.0003  |
| Attention deficit hyperactivity disorder | 17 (0.6)   | 11 (0.9)   | 11 (0.3)   | 0.009   | 11 (0.9)   | 6 (3.6)   | 5 (0.4)    | <0.0001 |

*AD* Atopic dermatitis

Data reported as n (%)

<sup>a</sup> AD cohort [“mild or moderate” or “moderate” or “severe”] versus matched non-AD control cohort

**Table S4.** Sleep burden by self-reported AD severity and in matched non-AD control cohorts

|                                | <b>Mild-to-moderate AD cohort<br/>N = 4039</b> |                                 | <b>Matched non-AD control cohort<br/>N = 4039</b> | <i>P</i> value <sup>a</sup> | <b>Moderate-to-severe AD cohort<br/>N = 1346</b> |                              | <b>Matched non-AD control cohort<br/>N = 1346</b> | <i>P</i> value <sup>a</sup> |
|--------------------------------|------------------------------------------------|---------------------------------|---------------------------------------------------|-----------------------------|--------------------------------------------------|------------------------------|---------------------------------------------------|-----------------------------|
|                                | <b>Mild AD<br/>n = 2862</b>                    | <b>Moderate AD<br/>n = 1177</b> |                                                   |                             | <b>Moderate AD<br/>n = 1177</b>                  | <b>Severe AD<br/>n = 169</b> |                                                   |                             |
| At least one sleep difficulty  | 1418 (49.6)                                    | 647 (55.0)                      | 1563 (38.7)                                       | <0.0001                     | 647 (55.0)                                       | 105 (62.1)                   | 528 (39.2)                                        | <0.0001                     |
| Severity of sleep difficulties |                                                |                                 |                                                   |                             |                                                  |                              |                                                   |                             |
| Mild                           | 758 (26.5)                                     | 241 (20.5)                      | 818 (20.3)                                        | <0.0001                     | 241 (20.5)                                       | 30 (17.8)                    | 273 (20.3)                                        | <0.0001                     |
| Moderate                       | 524 (18.3)                                     | 294 (25.0)                      | 576 (14.3)                                        |                             | 294 (25.0)                                       | 41 (24.3)                    | 202 (15.0)                                        |                             |
| Severe                         | 136 (4.8)                                      | 112 (9.5)                       | 169 (4.2)                                         |                             | 112 (9.5)                                        | 34 (20.1)                    | 53 (3.9)                                          |                             |
| Impact of sleep difficulties   |                                                |                                 |                                                   |                             |                                                  |                              |                                                   |                             |
| No impact                      | 151 (5.3)                                      | 58 (4.9)                        | 186 (4.6)                                         | <0.0001                     | 58 (4.9)                                         | 11 (6.5)                     | 67 (5.0)                                          | <0.0001                     |
| Little impact                  | 423 (14.8)                                     | 145 (12.3)                      | 454 (11.2)                                        |                             | 145 (12.3)                                       | 19 (11.2)                    | 147 (10.9)                                        |                             |
| Mild impact                    | 376 (13.1)                                     | 171 (14.5)                      | 414 (10.3)                                        |                             | 171 (14.5)                                       | 18 (10.7)                    | 137 (10.2)                                        |                             |
| Moderate impact                | 349 (12.2)                                     | 214 (18.2)                      | 405 (10.0)                                        |                             | 214 (18.2)                                       | 38 (22.5)                    | 134 (10.0)                                        |                             |
| Severe impact                  | 119 (4.2)                                      | 59 (5.0)                        | 104 (2.6)                                         |                             | 59 (5.0)                                         | 19 (11.2)                    | 43 (3.2)                                          |                             |

AD Atopic dermatitis

Data reported as n (%)

<sup>a</sup> AD cohort [“mild or moderate” or “moderate” or “severe”] versus matched non-AD control cohort

**Table S5.** EQ-5D-5L Index and VAS scores by self-reported AD severity and in matched non-AD control cohorts

|                | <b>Mild-to-moderate AD cohort<br/>N = 4039</b> |                                     | <b>Matched<br/>non-AD control<br/>cohort<br/>N = 4039</b> | <b><i>P</i> value<sup>a</sup></b> | <b>Moderate-to-severe AD cohort<br/>N = 1346</b> |                              | <b>Matched<br/>non-AD<br/>control<br/>cohort<br/>N = 1346</b> | <b><i>P</i> value<sup>a</sup></b> |
|----------------|------------------------------------------------|-------------------------------------|-----------------------------------------------------------|-----------------------------------|--------------------------------------------------|------------------------------|---------------------------------------------------------------|-----------------------------------|
|                | <b>Mild<br/>AD<br/>n = 2862</b>                | <b>Moderate<br/>AD<br/>n = 1177</b> |                                                           |                                   | <b>Moderate AD<br/>n = 1177</b>                  | <b>Severe AD<br/>n = 169</b> |                                                               |                                   |
| EQ-5D-5L index | 0.78 (0.22)                                    | 0.72 (0.26)                         | 0.81 (0.21)                                               | <0.0001                           | 0.72 (0.26)                                      | 0.67 (0.29)                  | 0.81 (0.23)                                                   | <0.0001                           |
| EQ-5D-5L VAS   | 70.91 (21.87)                                  | 66.11 (23.55)                       | 73.85 (21.61)                                             | <0.0001                           | 66.11 (23.55)                                    | 61.11 (25.76)                | 76.13 (21.65)                                                 | <0.0001                           |

*AD* Atopic dermatitis, *EQ-5D-5L* EuroQol 5-Dimensions 5-Level, *SD* standard deviation

Data reported as mean (SD)

<sup>a</sup> AD cohort [“mild or moderate” or “moderate” or “severe”] versus matched non-AD control cohort



**Table S6.** Work, productivity, and activity impairment by self-reported AD severity and in matched non-AD control cohorts

|                                      | Mild-to-moderate AD cohort |                  | Matched non-AD control cohort | <i>P</i> value <sup>a</sup> | Moderate-to-severe AD cohort |                  | Matched non-AD control cohort | <i>P</i> value <sup>a</sup> |
|--------------------------------------|----------------------------|------------------|-------------------------------|-----------------------------|------------------------------|------------------|-------------------------------|-----------------------------|
|                                      | Mild AD                    | Moderate AD      |                               |                             | Moderate AD                  | Severe AD        |                               |                             |
|                                      | <i>N</i> = 4039            |                  | <i>N</i> = 4039               |                             | <i>N</i> = 1346              |                  | <i>N</i> = 1346               |                             |
|                                      | <i>n</i> = 2862            | <i>n</i> = 1177  |                               |                             | <i>n</i> = 1177              | <i>n</i> = 169   |                               |                             |
| Activity impairment <sup>b</sup>     | 28.86<br>(28.52)           | 36.94<br>(29.91) | 25.79<br>(28.28)              | <0.0001                     | 36.94<br>(29.91)             | 42.84<br>(30.18) | 27.85<br>(29.04)              | <0.0001                     |
| Work impairment <sup>c</sup>         |                            |                  |                               |                             |                              |                  |                               |                             |
|                                      | <i>N</i> = 2053            |                  | <i>N</i> = 2150               |                             | <i>N</i> = 682               |                  | <i>N</i> = 732                |                             |
| Absenteeism <sup>d</sup>             | <i>n</i> = 1457            | <i>n</i> = 596   |                               |                             | <i>n</i> = 596               | <i>n</i> = 86    |                               |                             |
|                                      | 8.82<br>(22.80)            | 11.95<br>(24.98) | 6.88<br>(20.06)               | <0.0001                     | 11.95<br>(24.98)             | 12.22<br>(23.60) | 7.09<br>(19.68)               | 0.0002                      |
|                                      | <i>N</i> = 1983            |                  | <i>N</i> = 2097               |                             | <i>N</i> = 655               |                  | <i>N</i> = 720                |                             |
| Presenteeism <sup>e</sup>            | <i>n</i> = 1412            | <i>n</i> = 571   |                               |                             | <i>n</i> = 571               | <i>n</i> = 84    |                               |                             |
|                                      | 21.25<br>(25.45)           | 28.88<br>(27.49) | 19.41<br>(25.02)              | <0.0001                     | 28.88<br>(27.49)             | 36.43<br>(28.40) | 21.50<br>(26.00)              | <0.0001                     |
|                                      | <i>N</i> = 1970            |                  | <i>N</i> = 2092               |                             | <i>N</i> = 651               |                  | <i>N</i> = 716                |                             |
| Overall work impairment <sup>f</sup> | <i>n</i> = 1402            | <i>n</i> = 568   |                               |                             | <i>n</i> = 568               | <i>n</i> = 83    |                               |                             |
|                                      | 23.51<br>(27.79)           | 32.02<br>(30.33) | 21.37<br>(27.14)              | <0.0001                     | 32.02<br>(30.33)             | 40.55<br>(30.24) | 23.50<br>(28.08)              | <0.0001                     |

AD Atopic dermatitis, SD standard deviation, WPAI work productivity and activity impairment

Data reported as mean (SD)

<sup>a</sup> AD cohort [“mild or moderate” or “moderate” or “severe”] versus matched non-AD control cohort

<sup>b</sup> Percentage impairment in daily activities because of one’s health in the past 7 days

<sup>c</sup> Work impairment portion of the WPAI questionnaire only administered to respondents who were employed

<sup>d</sup> Percentage of work time missed because of one's health in the past 7 days

<sup>e</sup> Percentage impairment experienced while at work in the past 7 days because of one's health

<sup>f</sup> Combination of absenteeism and presenteeism
